# Supplementary material for: Roles of TGFβ and FGF signals during growth and differentiation of mouse lens epithelial cell in vitro
Source: PubMed Central journal article supplement (PMC5544739; doi:10.1038/s41598-017-07619-5), 2017-08-04
Supplement: 41598_2017_7619_MOESM1_ESM.pdf [file 41598_2017_7619_MOESM1_ESM.pdf]

**Roles of TGF $\beta$  and FGF signals during growth and differentiation of mouse lens epithelial cell *in vitro***

Dong Wang<sup>1,2,3</sup>, Eddie Wang<sup>1</sup>, Kelsey Liu<sup>1</sup>, Chun-hong Xia<sup>1</sup>, Song Li<sup>2,3,4</sup> & Xiaohua Gong<sup>1,\*</sup>

<sup>1</sup> School of Optometry and Vision Science Program, University of California Berkeley, California 94720, USA

<sup>2</sup> Department of Bioengineering, University of California, Berkeley, California 94720, USA

<sup>3</sup> Department of Bioengineering, University of California, Los Angeles, California 90095, USA

<sup>4</sup> Department of Medicine, University of California, Los Angeles, California 90095, USA

\* Corresponding author, Xiaohua Gong, Ph.D., School of Optometry and Vision Science Program, University of California, Berkeley, 695 Minor Hall, Berkeley, CA 94720. Email: [xgong@berkeley.edu](mailto:xgong@berkeley.edu)

Supplementary Information: Figure S1.

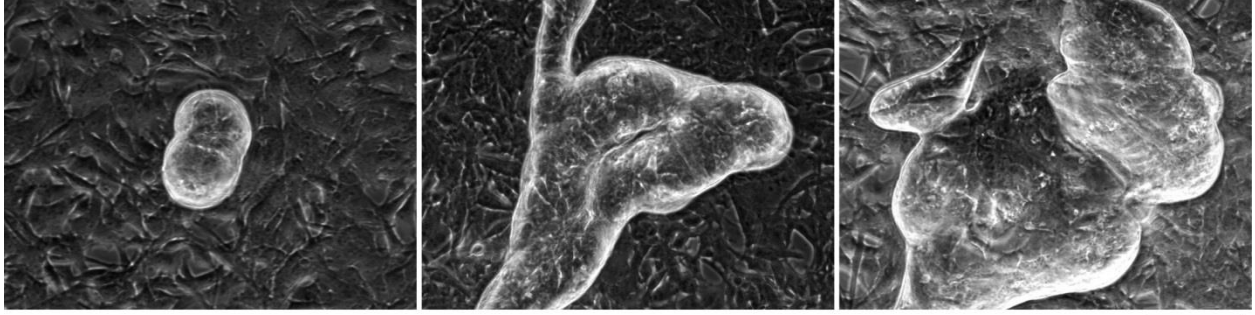

Supplementary Figure S1. Phase contrast images of lentoid bodies of different sizes. Scale bar, 100  $\mu\text{m}$ .
